1 **Dietary folic acid deficiency impacts hippocampal morphology and cortical acetylcholine**  
2 **metabolism in adult male and female mice**

3  
4  
5  
6 Calli Bennett BS<sup>1,2</sup>, Jacalyn Green PhD<sup>3</sup>, Mae Ciancio PhD<sup>4</sup>, Joanna Goral PhD<sup>5</sup>, Lenore Pitstick<sup>3</sup>  
7 BS, Matthew Pytynia BA<sup>4</sup>, Alice Meyer MBS<sup>5</sup>, Neha Kwatra BSc<sup>1,6</sup>, Nafisa M. Jadavji PhD<sup>1,7,8</sup>

8  
9 **Affiliations**

10 <sup>1</sup> Biomedical Sciences Program, College of Graduate Studies, Midwestern University, Glendale,  
11 US

12 <sup>2</sup> College of Osteopathic Medicine, Midwestern University, Glendale, US

13 <sup>3</sup> Biochemistry and Molecular Genetics, College of Graduate Studies, Midwestern University,  
14 Downers Grove, US

15 <sup>4</sup> Biomedical Sciences Program, College of Graduate Studies, Midwestern University, Downers  
16 Grove, US

17 <sup>5</sup> Anatomy, College of Graduate Studies, Midwestern University, Downers Grove, US

18 <sup>6</sup> College of Dental Medicine, Midwestern University, Glendale, US

19 <sup>7</sup> College of Veterinary Medicine, Midwestern University, Glendale, US

20 <sup>8</sup> Department of Neuroscience, Carleton University, Ottawa, Canada

21

22 **Corresponding Author**

23 Nafisa M. Jadavji, PhD

24 Department of Biomedical Sciences

25 College of Graduate Studies

26 Midwestern University

27 19555 N 59th Ave

28 Glendale, AZ 85308, USA

29 Phone: 623-572-3665

30 Fax : 623-572-3647

31 E-mail: [njadav@midwestern.edu](mailto:njadav@midwestern.edu)

32

33 **Abstract**

34

35 ***Objective***

36 One-carbon metabolism is a metabolic network that integrates nutritional signals with  
37 biosynthesis, redox homeostasis, and epigenetics. There are sex differences in hepatic one-carbon  
38 metabolism. However, it is unclear whether there are sex differences in dietary deficiencies of one-  
39 carbon metabolism in the brain. The aim of this study was to investigate if sex modulates the  
40 effects of dietary folic acid deficiency in brain tissue using a mouse model.

41 ***Methods***

42 Male and female C57Bl/6J mice were placed on a folic acid deficient (FD) or control diet (CD) at  
43 six weeks of age. Mice were maintained on these diets for six months, after which animals were  
44 euthanized and brain tissue and serum were collected for analysis. Serum folate levels were  
45 measured. In brain tissue, hippocampal volume and morphology including Cornu Ammonis 1 and  
46 3 (CA1; CA3), and dentate gyrus thickness were measured. Apoptosis within the hippocampus  
47 was assessed using active caspase-3 immunofluorescence staining. Additionally, cortical  
48 acetylcholine metabolism was measured in brain tissue using immunofluorescence staining of  
49 acetylcholinesterase (AChE), or choline acetyltransferase (ChAT), and neuronal nuclei (NeuN).

50 ***Results***

51 Male and female FD mice had reduced serum levels of folate. Both males and females maintained  
52 on a FD showed a decrease in the thickness of the hippocampal CA1-CA3 region. Interestingly,  
53 there was a sex difference in the levels of active caspase-3 within the CA3 region of the  
54 hippocampus. In cortical tissue, there were increased levels of neuronal ChAT and reduced levels  
55 of AChE in FD females and male mice.

56 ***Conclusions***

57 The results indicated that FD impacts hippocampal morphology and cortical neuronal  
58 acetylcholine metabolism. The data from our study indicate that there was only one sex difference  
59 and that was in hippocampal apoptosis. Our study provides little evidence that sex modulates the  
60 effects of dietary folate deficiency on hippocampal morphology and cortical neuronal  
61 acetylcholine metabolism.

62

63 **Keywords**

64 One- carbon metabolism; folic acid; hippocampus; apoptosis; acetylcholine; sex differences

## 65 **1. Introduction**

66 One-carbon (1C) metabolism is a key metabolic network that integrates nutrition signals  
67 with biosynthesis, redox homeostasis, and epigenetics. It plays an essential role in the regulation  
68 of cell proliferation, stress resistance, and embryonic development. Folate, also known as vitamin  
69 B9, is the main component of 1C metabolism. Folates act as 1C donors in the regeneration of  
70 methionine from homocysteine, nucleotide synthesis and repair, and DNA methylation (1).

71 While gastrointestinal bacteria produce small amounts of folate, the majority are obtained  
72 in our diets. However, the bioavailability and stability from these dietary sources are much lower  
73 than synthetic, folic acid (2). Many countries fortify foods with folic acid in order to reduce  
74 deficiencies and related negative health outcomes (3). However, even in countries in which  
75 fortifying foods is routine, deficiencies remain fairly common. Deficiencies are seen in individuals  
76 that have a high rate of tissue turnover (e.g., pregnant women), have an alcohol use disorder (4),  
77 or in those using folate antagonist drugs (e.g., methotrexate) (5). Additionally, deficiencies are  
78 common in the elderly population, which is especially vulnerable to malnutrition and folate  
79 absorption impairments (6).

80 Folate's role in the regeneration of methionine from homocysteine proves especially  
81 significant when considering vascular and brain health. Elevated levels of homocysteine, that can  
82 be a result of folic acid deficiency, have been linked to several negative health outcomes, including  
83 increased risk for Alzheimer's Disease (7), and cerebrovascular diseases including stroke (8).  
84 Additionally, hyperhomocysteinemia is an important indicator of post-stroke recovery (9),  
85 mortality (10), and risk of recurrence (11). Homocysteine leads to downstream oxidative damage  
86 (12), indicating a potential mechanism behind its role in neuronal degeneration and atherosclerosis  
87 (13).

88 Choline, another component of 1C metabolism, is an essential nutrient. Folate and choline  
89 metabolism are tightly linked. In model systems that study the impact of reduced levels of dietary  
90 folates, choline metabolism is also affected (14–17). Choline can act as a 1C donor, especially in  
91 situations of diminished folate. In the brain, choline is also involved in the production of  
92 acetylcholine, the main neurotransmitter of the parasympathetic nervous system, and lipid  
93 membrane synthesis. Acetylcholine is synthesized by choline acetyltransferase (ChAT) and  
94 hydrolyzed by acetylcholinesterase (AChE). Reduced levels of choline have been reported to result  
95 in more apoptosis in cultured cells (18) and were observed in the hippocampus of offspring of  
96 choline deficient females (19). *In vivo* rodent studies have also shown cognitive impairment,  
97 because of a dietary choline deficiency. The hippocampus is particularly vulnerable to both choline  
98 and folate dietary deficiencies (14,16,20,21).

99 There is growing evidence that there are significant sex differences with regard to 1C  
100 metabolism (22–24), including quantifiable differences in homocysteine levels (25). Males  
101 homozygotic for the polymorphism in methylenetetrahydrofolate reductase are more vulnerable to  
102 factors (e.g., smoking) that increase levels of homocysteine (25). Estrogen may serve as a  
103 protective factor because it is linked to reduced homocysteine levels in blood. Decreased  
104 homocysteine levels lead to declined risk for vascular diseases (25). Furthermore, using a model,  
105 five key hepatic 1C metabolism enzymes are differentially expressed in males and females(23).  
106 Estrogen and other female hormones impact expression of these enzymes, leading to increased  
107 levels of homocysteine in males, and increased levels of choline and betaine in females(23).  
108 Further, folate intake and expression of genes in 1C metabolism regulate steatosis in a sex specific  
109 manner (26). Despite the significant evidence of hepatic 1C differences between sexes, limited  
110 evidence exists on the brain. A recent study, including both male and female mice, demonstrated

111 that there are significant sex differences in behavior observed caused by a  
112 methylenetetrahydrofolate reductase deficiency (22,24). The aim of this study was to investigate  
113 if sex modulates the effects of dietary folic acid deficiency in brain tissue using a mouse model.  
114 We hypothesized dietary folic acid deficiency would result in reduced levels dietary folate in males  
115 and females and that sex would impact on hippocampal morphology and cortical acetylcholine  
116 metabolism in mice maintained on a folic acid deficient diet.

## 117 **2. Methods**

### 118 ***2.1 Experimental design***

119 All experiments were done in accordance with IACUC animal welfare protocols and were  
120 approved by the Midwestern University Downers Grove IACUC Committee. Male and female  
121 C57Bl/6J mice were put on a folic acid deficient (FD) or control (CD) diets (Envigo) at 6 weeks  
122 of age (Table 1). Animals had access to food and water *ad libitum*. Each diet group had 5 males  
123 and 5 females; a total of 20 animals were used.

124 The CD and FD contained the same concentrations of macro-micro-nutrients, except for  
125 folic acid (Table 1). The CD contained 2.0 mg/kg of folic acid (TD.04194), while FD contained  
126 0.2 mg/kg of folic acid (TD.95247) (27,28). Mice were maintained on these diets for 6 months.  
127 Animals were weighed weekly throughout the experiment. At 8 months of age mice were  
128 euthanized with CO<sub>2</sub> inhalation and cervical dislocation. This corresponds to mature adults in  
129 humans (29).

130

131

132 **Table 1.** List of micro- and macro-nutrient contents in Envigo control (TD.04194) and folic acid  
 133 deficient diet (TD.95247). The Envigo folic acid deficient (TD.95247) was identical to the control  
 134 diet (TD.04194) except it contained 0.2 mg/kg folic acid.

| <b>Category</b>               | <b>Concentration</b> | <b>Category</b>       | <b>Concentration</b> |
|-------------------------------|----------------------|-----------------------|----------------------|
| <b>Amino acids</b>            | <b>(g/kg)</b>        | <b>Lipids</b>         | <b>(g/kg)</b>        |
| Lysine                        | 14                   | Total fat             | 60.0                 |
| Methionine                    | 4.7                  | Saturated fat         | 9.0                  |
| Cystine                       | 3.6                  | Monounsaturated fat   | 13.8                 |
| Arginine                      | 6.6                  | Polyunsaturated fat   | 36.6                 |
| Phenylalanine                 | 8.8                  | 4:0 Butyric acid      | 0.0                  |
| Tyrosine                      | 9.2                  | 6:0 Caproic Acid      | 0.0                  |
| Histidine                     | 5.1                  | 8:0 Caprylic Acid     | 0.0                  |
| Isoleucine                    | 10.1                 | 10:0 Capric acid      | 0.0                  |
| Leucine                       | 16                   | 12:0 Lauric acid      | 0.0                  |
| Threonine                     | 7.6                  | 14:0 Myristic Acid    | 0.0                  |
| Tryptophan                    | 2.1                  | 16:0 Palmitic acid    | 6.6                  |
| Valine                        | 11.7                 | 16:1 Palmitoleic acid | 0.0                  |
| Aspartic Acid                 | 12.1                 | 18:0 Stearic acid     | 2.4                  |
| Glutamic acid                 | 36.6                 | 18:1 Oleic acid       | 13.8                 |
| Alanine                       | 5.2                  | 18:2 Linoleic acid    | 31.8                 |
| Glycine                       | 3.2                  | 18:3 Linolenic acid   | 4.8                  |
| Proline                       | 18.1                 | Cholesterol           | 8.8 mg/kg            |
| Serine                        | 10                   |                       |                      |
| <b>Fat-soluble Vitamins</b>   | <b>(IU/kg)</b>       | <b>Minerals</b>       | <b>(mg/kg)</b>       |
| Vitamin A                     | 4000                 | Calcium               | 5100                 |
| Vitamin D                     | 1000                 | Phosphorus            | 3000                 |
| Vitamin E                     | 75                   | Potassium             | 3600                 |
| Vitamin K                     | 0.8                  | Sodium                | 1000                 |
| <b>Water-soluble Vitamins</b> | <b>(mg/kg)</b>       | Chlorine              | 1600                 |
| Biotin                        | 0.20                 | Magnesium             | 515                  |
| Choline                       | 1147.5               | Copper                | 6.0                  |
| Folic acid                    | 2.0                  | Iron                  | 36.5                 |
| Niacin                        | 30.0                 | Zinc                  | 35.6                 |
| Pantothenate                  | 14.7                 | Manganese             | 10.5                 |
| Riboflavin                    | 6.0                  | Iodine                | 0.21                 |
| Thiamin                       | 4.9                  | Selenium              | 0.15                 |
| Vitamin B <sub>6</sub>        | 5.8                  | Molybdenum            | 0.15                 |
| Vitamin B <sub>12</sub>       | 0.03                 | Chromium              | 1.00                 |
| Vitamin C                     | 0.0                  |                       |                      |

135

## 136 **2.2 Tissue collection**

137 At time of euthanization body and brain weights were recorded. Tissue including brain and  
138 blood were collected for analysis. Serum was isolated from blood and stored at -80°C until  
139 analysis. Brain tissues were fixed in 4% paraformaldehyde overnight and then switched over to a  
140 70% ethanol solution. Tissue was processed and embedded in paraffin in a coronal orientation.  
141 Brain tissue was sectioned using a microtome (Leica) at 5-µm thickness. Sections were slide  
142 mounted and stored at room temperature for staining.

## 143 **2.3 Microbiological assay for serum folate**

144 Serum folate was measured using a microbiological assay (30). *Lactobacillus rhamnosus*  
145 (ATCC) was grown overnight in Folic Acid Casei Medium (Difco) supplemented with 0.025%  
146 sodium ascorbate (A7631, Sigma-Aldrich,) and 1.2 ng/ml of (6S)-5-formyltetrahydrofolate  
147 (Schirks Laboratories). An equal volume of 80% sterile glycerol was added to the overnight culture  
148 and 1 ml aliquots were frozen and stored at -80°C. The day of the assay, an aliquot of *L. rhamnosus*  
149 was thawed and 100ul was added to 50ml of Folic Acid Casei Medium supplemented with 0.025%  
150 sodium ascorbate. The approximately 20 mg/liter folic acid stock (Sigma-Aldrich) was 0.22 µm  
151 filter sterilized, verified by absorbance spectra at 282 (molar absorptivity coefficient= 27,000 M<sup>-1</sup>,  
152 MW= 441.4), and stored at -20°C. Dilutions of the folic acid stock and test sera were made in  
153 freshly prepared 0.22 µm filter sterilized 0.5% sodium ascorbate. Through a series of dilutions, a  
154 folic acid standard curve with 100µl/well in duplicate was generated from 0 to 166 pg/ml final  
155 concentration. Test sera was diluted with sterile 0.5% sodium ascorbate before the assay. Several  
156 dilutions of sera, 1:600-1:2400 final concentration, at 100µl/well in duplicate were tested to ensure  
157 that an A<sub>600</sub> fell within the standard curve. The inoculated media was added at 200µl/well to the



158 10 x10 Bioscreen honeycomb plate (Fisher Scientific). The plate was loaded into the Bioscreen C  
159 accompanied with EZExperiment 1.26 software (OY Growth Curves Ab Ltd), incubated at 37°C  
160 with shaking for 24 hours, and A<sub>600</sub> read at 24 hours (30).

#### 161 ***2.4 Brain tissue morphological analysis***

162 Series of brain tissue samples were stained with 1% cresyl violet (Sigma) to assess  
163 morphological changes. Images were taken using Nikon Ni-U Compound Light microscope.  
164 Analysis of morphological changes focused on the hippocampal formation as previous studies  
165 demonstrate that this area is particularly vulnerable to deficiencies in 1C metabolism (14,16,20).  
166 Thickness measurements of the granular cell layer were taken using ImageJ (NIH) (31,32) within  
167 the dentate gyrus, Cornu Ammonis 1 (CA1) and 3 (CA3) regions of the hippocampus. The total  
168 volume of the hippocampus was measured using ImageJ (NIH) (31,32) by tracing the perimeter of  
169 the structure. For each measurement a minimum of 3 brain tissue sections per animals were used  
170 and each hemisphere was measured. An average of 6 measurements was used per animal.

#### 171 ***2.5 Immunofluorescence***

172 Antigen retrieval on paraffin embedded brain tissue sections was performed prior to  
173 staining as previously described (33). A series of brain tissue sections were stained with the  
174 following antibodies: anti-choline acetyltransferase (ChAT) (Millipore, AB144P) at 1:100; anti-  
175 acetylcholinesterase (AChE) (Sigma, SAB2500018) at 1:100; or anti-active caspase-3 (Cell  
176 Signaling, 9662) at 1:100. All samples were co-stained with anti-neuronal nuclei antibody (NeuN,  
177 ab104224) (AbCam) at 1:200 and (4',6-diamidino-2-phenylindole) DAPI (Fisher Scientific) at  
178 1:10,000.

179           Imaging of ChAT and AChE was conducted using a Zeiss Apotome microscope equipped  
180 with a camera. Two brain tissue sections with three subfields within each cortex were imaged.  
181 Imaging of active caspase-3 was performed using an Olympus inverted microscope equipped with  
182 a camera. The hippocampus was analyzed using two images of CA1, CA3, or three dentate gyrus  
183 for each animal. Only cells demonstrating colocalization of ChAT, AChE, or active caspase-3  
184 along with NeuN and DAPI were considered positive and counted.

## 185 ***2.6 Data and statistical analysis***

186           All data analysis was conducted by 2 individuals blinded to experimental groups. Data  
187 were analyzed using GraphPad Prism 9.0 and IBM SPSS Statistics 25. Weekly body weights were  
188 analyzed using repeated measures ANOVA using IBM SPSS Statistics 25. Two-way analysis of  
189 variance (ANOVA) was used to determine interactions and main effects between diet groups (folic  
190 acid deficient or control) and sex (male or female). Analyses included brain and body weight,  
191 morphological measurements, immunofluorescence of choline metabolism (AChE and ChAT),  
192 and active caspase-3. Pairwise post-hoc testing was performed using the Tukey's multiple  
193 comparison test. In all analyses,  $p < 0.05$  was considered statistically significant.

## 194 **3. Results**

### 195 ***3.1 Body and brain weight***

196           Body weights were collected on a weekly basis; a difference between male and females  
197 (Figure 1A,  $F_{(1,14)} = 50.80$ ,  $p < 0.001$ ). However, there was no difference by diet ( $F_{(1,14)} = 0.048$ ,  $p$   
198  $= 0.830$ ). Brain and body weights were collected at time of euthanization and the data was  
199 analyzed. There was a sex difference in body weight (Figure 1B,  $F_{(1,14)} = 48.48$ ,  $p < 0.001$ ), but

200 there was no effect of diet ( $F_{(1,14)} = 1.97$ ,  $p = 0.18$ ). There was no difference in brain weight  
201 observed (Figure 1C, Sex:  $F_{(1,14)} = 2.58$ ,  $p = 0.13$ , Diet:  $F_{(1,14)} = 1.13$ ,  $p = 0.31$ ). When analyzing  
202 brain weight as a percent of body weight, females had a higher percent brain weight than males  
203 (Figure 1D,  $F_{(1,14)} = 73.99$ ,  $p < 0.0001$ ). Female FD mice had smaller brain weight as percent of  
204 body when compared to female CD mice ( $F_{(1,14)} = 6.217$ ,  $p = 0.026$ ).

### 205 ***3.2 Serum folate measurements***

206 Folate levels were measured in serum collected from all animals to confirm dietary  
207 deficiency. There was no sex difference ( $F_{(1,14)} = 2.40$ ,  $p = 0.14$ ). Compared to CD mice, animals  
208 maintained on the FD had reduced levels of folate in their serum (Figure 1A;  $F_{(1,14)} = 10.52$ ,  $p =$   
209  $0.0059$ ).

### 210 ***3.3 Hippocampal volume and morphology***

211 Previous work has shown that the hippocampus is affected by a 1C deficiency (14,19,21).  
212 The hippocampus volume was analyzed using ImageJ, and thickness of the dentate gyrus, CA1,  
213 and CA3 regions. There was no sex difference (Figure 2B;  $F_{(1,12)} = 0.37$ ,  $p = 0.55$ ) in the total  
214 hippocampal volume. However, there was a trend for lower hippocampal volume of mice  
215 maintained on FD ( $F_{(1,12)} = 4.37$ ,  $p = 0.059$ ). There was no sex (Figure 2C;  $F_{(1,12)} = 0.86$ ,  $p =$   
216  $0.37$ ) or diet ( $F_{(1,12)} = 1.15$ ,  $p = 0.31$ ) differences in the thickness of the dentate gyrus. There was  
217 no sex difference in the thickness of CA1 and 3 regions ( $F_{(1,13)} = 0.94$ ,  $p = 0.35$ ). However, there  
218 was a decrease in the thickness of the CA1 and 3 regions of mice maintained on a FD diet (Figure  
219 2D;  $F_{(1,13)} = 37.3$ ,  $p < 0.0001$ ).

220

### 221 ***3.4 Hippocampal apoptosis***

222

223 Hippocampal apoptosis was assessed by counting active caspase-3 positive neuronal cells,  
224 such cells were counted within the dentate gyrus, CA1, and CA3 regions of the hippocampus.  
225 There was no difference in neuronal apoptosis between groups within the dentate gyrus (sex: F  
226  $(1,12) = 0.035$ ,  $p = 0.86$ , diet: F  $(1,13) = 0.033$ ,  $p = 0.86$ ). There was a trend for a sex difference of  
227 apoptotic neurons within the CA1 region (F  $(1,12) = 3.502$ ,  $p = 0.084$ ), but there was no difference  
228 between dietary groups (F  $(1,12) = 0.00083$ ,  $p = 0.99$ ). Representative images of active caspase-3  
229 staining within the CA3 are shown in Figures 3A to D. There was a difference in the number of  
230 positive apoptotic neurons between females and males (Figure 3E; (F  $(1,12) = 7.36$ ,  $p = 0.019$ )), but  
231 no dietary difference (F  $(1,12) = 1.44$ ,  $p = 0.25$ ).

### 232 **3.5 Cortical choline metabolism**

233 Neuronal cortical choline metabolism was characterized by counting the number choline  
234 acetyltransferase (ChAT) positive cells. This enzyme is involved in the synthesis of acetylcholine  
235 at the synapse. Representative images are shown in Figure 4A to D. Quantification revealed no  
236 difference between sexes (F  $(1,12) = 1.79$ ,  $p = 0.21$ ), however, there were increases in ChAT positive  
237 neurons in the FD groups when compared to CD mice (Figure 4E; F $(1,12) = 4.58$ ,  $p = 0.050$ ).

238 To confirm changes in choline metabolism in brain tissue, we also measured acetylcholine  
239 esterase (AChE) levels in neurons within the cortex. Representative images are shown in Figure  
240 5A to D. Quantification revealed no difference between sexes (F  $(1,12) = 0.49$ ,  $p = 0.49$ ), but did  
241 reveal decreases in FD mice compared to CD animals (Figure 5E; F $(1,12) = 7.29$ ,  $p = 0.019$ ).

242

## 243 **4. Discussion**

244 One-carbon metabolism involves multiple complex factors that coordinate gene expression  
245 and metabolism in response to nutritional signals that impact cellular anabolism, redox

246 homeostasis, and epigenetics. There is growing evidence that sex plays a significant role in one-  
247 carbon metabolism and in regulating levels of blood homocysteine (22–25). Despite this, there is  
248 limited evidence for sex differences in brain tissue. Using a mouse model, our study investigated  
249 the impact of sex and dietary folic acid deficiency on hippocampal morphology and brain choline  
250 metabolism. As expected, the FD mice had lower serum folates than CD mice. Notably, our results  
251 indicate a significant decrease in the thickness of the granular layer within the CA1-CA3 region in  
252 both males and females maintained on a FD. In cortical tissue we demonstrate changes in  
253 acetylcholine metabolism between diet groups. The only sex difference we report in our study is  
254 the decreased apoptosis observed in the CA3 region of the hippocampus in males compared to  
255 females.

256 Consistent with prior research, our results demonstrate an intrinsic link between choline  
257 and folate metabolism (14–17). Specifically, our results show the novel finding of increased levels  
258 of cortical neuronal ChAT, the enzyme that catalyzes the synthesis of acetylcholine from choline  
259 at the synapse and decreased levels of AChE, the enzyme that catalyzes the destruction of  
260 acetylcholine within cortical neurons. Choline can act as a 1C donor in the liver and kidney  
261 via betaine homocysteine methyltransferase, especially when folate levels are low (33,34). This  
262 compensatory function of choline shunts choline away from the production of acetylcholine,  
263 potentially leading to lower levels of the neurotransmitter (14,15,17). Therefore, we suggest a  
264 potential mechanism for the demonstrated changes in cortical choline metabolism is a  
265 compensatory upregulation of ChAT and downregulation of AChE in response to decreased levels  
266 of acetylcholine. Low levels of acetylcholine have been associated with cognitive impairments,  
267 including mild cognitive impairment and dementia (35). An interesting follow-up to this study

268 would be to assess cognitive function in adult females and males maintained on folic acid deficient  
269 and control diets.

270 The hippocampus is impacted by a genetic or dietary deficiency in 1C metabolism, as  
271 shown by others; our results demonstrate this effect as well (14,16,21). The different areas of the  
272 hippocampus and their functions are topics of ongoing research. In humans, the CA3 region has  
273 been specifically linked to spatial representations and episodic memory. Additionally, the CA3  
274 region is susceptible to neurodegeneration, possibly accounting for our results (36). Both *in vivo*  
275 and *in vitro* studies have demonstrated that reduced levels of folate result in an increase in apoptotic  
276 markers (19,37–39), possibly due to increases in oxidative stress (40), DNA damage (38), or  
277 neuroexcitatory mechanisms (41). Recent *in vivo* studies have indicated similar results, with  
278 hyperhomocysteinemia, a direct consequence of 1C deficiency, leading to increased autophagy  
279 and apoptosis of cortical neurons(42).

280 While our results did not indicate a diet difference in apoptosis, there was a significant sex  
281 difference in apoptosis in the CA3 region of the hippocampus. The CA3 region is the most  
282 interconnected region of the hippocampus and has been implicated in memory functions and  
283 neurodegeneration (36). In order to measure levels of apoptosis, we stained for active caspase-3,  
284 which, as an executioner caspase leading to cell death, acts as an indirect measure of apoptosis  
285 (43). Previous research demonstrates a distinct sex difference in the activation of caspases,  
286 specifically following brain injury (44,45). These differences could be accounted for by sex  
287 hormones, potentially via the pro-apoptotic protein Bax (46). Model studies have indicated a  
288 significant sex difference in gross hippocampal morphology within the hippocampus including the  
289 dentate gyrus, CA1 and CA3 regions (47). A recent human study indicates that after adjusting for  
290 total hippocampal volume, regional sex differences exist, however, they are not present in the

291 CA2/CA3 regions or the dentate gyrus (48). We are not observing a diet impact on apoptosis,  
292 which has been previously reported (19). We think that the duration and time point of dietary  
293 deficiency may be an important factor, since there is minimal apoptosis that occurs in the normal  
294 adult brain (49). Apoptosis in the brain is associated with key time points, such as after birth (49)  
295 and damage (50,51).

296 In conclusion, our study demonstrates stronger evidence that folate availability modulates  
297 changes in brain tissue more than sex in adult mice. Future research should aim to include  
298 behavioral analysis measuring cognitive function of male and females maintained on a 1C deficient  
299 diets.

300

301 **Acknowledgments**

302 The authors would like to the College of Graduate Studies for the generous support of this  
303 collaboration. CB was funded by the Kenneth A. Suarez Research Fellowship.

304

305 **Disclosure statement**

306

307 None

308

309 **Notes on contribution**

310

311 Calli Bennett BSc is a Doctor of Osteopathic Medicine student at Midwestern University. Calli  
312 graduated with an Honors Bachelor of Science degree in Anthropology from the University of  
313 Utah.

314

315 Jacalyn Green PhD is a Professor in the Department of Biochemistry and Molecular Genetics at  
316 Midwestern University Downers Grove campus.

317

318 Mae Ciancio PhD is an Associate Professor in the Biomedical Sciences Program at Midwestern  
319 University Downers Grove campus.

320

321 Joanna Goral PhD is an Associate Professor in the Department of Anatomy at Midwestern  
322 University Downers Grove campus.

323

324 Lenore Pitstick BS is a Department Research Coordinator in the Department of Biochemistry and  
325 Molecular Genetics at Midwestern University Downers Grove campus.

326

327 Matt Pytynia BA is a Senior Research Specialist in the Biomedical Sciences Program at  
328 Midwestern University Downers Grove campus.

329

330 Alice Meyer MBS is a Senior Research Associate in the Department of Anatomy at Midwestern  
331 University Downers Grove campus.

332

333 Neha Kwatra BSc is a Doctor of Dental Medicine student at Midwestern University. Neha  
334 graduated with a BSc in Physiology from the University of Arizona.

335

336 Nafisa M. Jadavji PhD is an Assistant Professor in Biomedical Sciences at Midwestern  
337 University (US) and Research Assistant Professor in Neuroscience at Carleton University  
338 (Canada).

339



340 **Figure Captions**

341  
342 **Figure 1.** The impact of dietary folic acid deficiency and sex on body and brain weight. Weekly  
343 body weights (A) for duration of 6-month experimental period. At time of euthanization body  
344 weight (B), brain weight (C) and brain weight as a percent of body weight (D). Line graph and  
345 scatter plot with mean  $\pm$  SEM of 3 to 5 mice per group. \*  $p < 0.05$  indicate sex difference after  
346 repeated measures 2-way ANOVA. \*\*\* $p < 0.001$  indicate Tukey's pairwise comparison between  
347 groups.

348  
349 **Figure 2.** The impact of dietary folic acid deficiency and sex on serum folate levels (A) and  
350 hippocampal volume (B), and thickness of dentate gyrus granular cell layer (C) and Cornu  
351 Ammonis (CA) 1 and 3 region (D). Scatter plot with mean  $\pm$  SEM of 3 to 5 mice per group.  
352 \* $p < 0.05$  and \*\* $p < 0.01$  indicate Tukey's pairwise comparison between groups.

353  
354 **Figure 3.** The impact of dietary folic acid deficiency and sex on active caspase-3 levels within the  
355 hippocampal Cornu Ammonis 3 (CA3) region of brain tissue. Representative images of active  
356 caspase-3, neuronal nuclei (NeuN), and 4',6-diamidino-2-phenylindole (DAPI) from all  
357 experimental groups (A -D). Blinded quantification of active caspase-3, NeuN, and DAPI positive  
358 cells (E). Scatter plot with mean  $\pm$  SEM of 3 to 5 mice per group. \* $p < 0.05$  indicates sex main  
359 effect between males and females.

360  
361 **Figure 4.** The impact of dietary folic acid deficiency and sex on neuronal choline acetyltransferase  
362 (ChAT) levels within the cortex of adult mice. Representative images from all experimental groups  
363 (A to D) of ChAT, neuronal nuclei (NeuN), and 4',6-diamidino-2-phenylindole (DAPI).

364 Quantification of ChAT, NeuN, and DAPI positive cells (E). Scatter plot with mean  $\pm$  SEM of 3  
365 to 5 mice per group. \*  $p < 0.05$  indicate Tukey's pairwise comparison between groups.

366

367 **Figure 5.** The effect of dietary folic acid deficiency and sex on neuronal acetylcholine transferase  
368 (AChE) levels within the cortex of adult mice. Representative images from all experimental groups

369 (A to D) of AChE, neuronal nuclei (NeuN), and 4',6-diamidino-2-phenylindole (DAPI).

370 Quantification of AChE, NeuN, and DAPI positive cells (E). Scatter plot with mean  $\pm$  SEM of 3

371 to 5 mice per group. \*  $p < 0.05$  indicate Tukey's pairwise comparison between indicated groups.

372

## 373 **References**

- 374 1. Folate in Health and Disease [Internet]. Routledge & CRC Press. [cited 2021 Apr 24].  
375 Available from: <https://www.routledge.com/Folate-in-Health-and->  
376 [Disease/Bailey/p/book/9781138111882](https://www.routledge.com/Folate-in-Health-and-Disease/Bailey/p/book/9781138111882)
- 377 2. Caudill MA. Folate bioavailability: Implications for establishing dietary recommendations  
378 and optimizing status. *Am J Clin Nutr.* 2010 May;91(5):1455S-1455S.
- 379 3. Crider KS, Bailey LB, Berry RJ. Folic acid food fortification-its history, effect, concerns,  
380 and future directions. *Nutrients.* 2011 Mar;3(3):370–84.
- 381 4. Halsted CH, Villanueva JA, Devlin AM. Folate deficiency, methionine metabolism, and  
382 alcoholic liver disease. In: *Alcohol.* 2002. p. 169–72.
- 383 5. Morgan SL, Baggott JE, Vaughn WH, Austin JS, Veitch TA, Lee JY, et al.  
384 Supplementation with folic acid during methotrexate therapy for rheumatoid arthritis: A  
385 double-blind, placebo-controlled trial. *Ann Intern Med.* 1994 Dec;121(11):833–41.
- 386 6. Enderami A, Zarghami M, Darvishi-Khezri H. The effects and potential mechanisms of  
387 folic acid on cognitive function: a comprehensive review. *Neurol Sci.* 2018  
388 Oct;39(10):1667–75.
- 389 7. Seshadri S, Beiser A, Selhub J, Jacques PF, Rosenberg IH, D’Agostino RB, et al. Plasma  
390 homocysteine as a risk factor for dementia and Alzheimer’s disease. *N Engl J Med.*  
391 2002;346(7):476–83.
- 392 8. Casas JP, Bautista LE, Smeeth L, Sharma P, Hingorani AD. Homocysteine and stroke:  
393 Evidence on a causal link from mendelian randomisation. *Lancet.* 2005;365(9455):224–32.
- 394 9. Kwon H-M, Lee Y-S, Bae H-J, Kang D-W. Homocysteine as a predictor of early  
395 neurological deterioration in acute ischemic stroke. *Stroke.* 2014 Mar;45(3):871–3.
- 396 10. Shi Z, Guan Y, Huo YR, Liu S, Zhang M, Lu H, et al. Elevated Total Homocysteine Levels  
397 in Acute Ischemic Stroke Are Associated With Long-Term Mortality. *Stroke.*  
398 2015;46(9):2419–25.
- 399 11. Kumral E, Saruhan G, Aktert D, Orman M. Association of Hyperhomocysteinemia with  
400 Stroke Recurrence after Initial Stroke. *J Stroke Cerebrovasc Dis.* 2016;1–8.
- 401 12. Ho PI, Ashline D, Dhitavat S, Ortiz D, Collins SC, Shea TB, et al. Folate deprivation  
402 induces neurodegeneration: roles of oxidative stress and increased homocysteine. *Neurobiol*  
403 *Dis.* 2003;14:32–42.
- 404 13. Castro R, Rivera I, Blom HJ, Jakobs C, de Almeida IT. Homocysteine metabolism,  
405 hyperhomocysteinemia and vascular disease: An overview. *J Inher Metab Dis.* 2006  
406 Feb;29(1):3–20.

- 407 14. Jadavji NM, Deng L, Leclerc D, Malysheva O, Bedell BJ, Caudill MA, et al. Severe  
408 methylenetetrahydrofolate reductase deficiency in mice results in behavioral anomalies  
409 with morphological and biochemical changes in hippocampus. *Mol Genet Metab*. 2012  
410 Jun;106(2):149–59.
- 411 15. Chan A, Tchanchou F, Graves V, Rozen R, Shea TB. Dietary and genetic compromise in  
412 folate availability reduces acetylcholine, cognitive performance and increases aggression:  
413 Critical role of S-adenosyl methionine. *J Nutr Health Aging*. 2008 Apr;12(4):252–61.
- 414 16. Bahous RH, Jadavji NM, Deng L, Cosín-Tomás M, Lu J, Malysheva O, et al. High dietary  
415 folate in pregnant mice leads to pseudo-MTHFR deficiency and altered methyl metabolism,  
416 with embryonic growth delay and short-term memory impairment in offspring. *Hum Mol  
417 Genet*. 2017;26(5):888–900.
- 418 17. Dam K, Füchtmeier M, Farr T, Boehm-Strum P, Foddiss M, Dirnagal U, et al. Deficiencies  
419 in methylenetetrahydrofolate reductase and dietary folic acid alter choline metabolism  
420 during chronic hypoperfusion. *Behav Brain Res*. 2017;321:201–8.
- 421 18. Yen C-LE, Mar M-H, Craciunescu CN, Edwards LJ, Zeisel SH. Deficiency in methionine,  
422 tryptophan, isoleucine, or choline induces apoptosis in cultured cells. *J Nutr*. 2002  
423 Jul;132(7):1840–7.
- 424 19. Jadavji NM, Deng L, Malysheva OV, Caudill MA, Rozen R. MTHFR deficiency or  
425 reduced intake of folate or choline in pregnant mice results in impaired short-term memory  
426 and increased apoptosis in the hippocampus of wild-type offspring. *Neuroscience*.  
427 2015;300:1–9.
- 428 20. Troen AM, Chao W-H, Crivello NA, D’Anci KE, Shukitt-Hale B, Smith DE, et al.  
429 Cognitive impairment in folate-deficient rats corresponds to depleted brain  
430 phosphatidylcholine and is prevented by dietary methionine without lowering plasma  
431 homocysteine. *J Nutr*. 2008 Dec;138(12):2502–9.
- 432 21. Chen Z, Schwahn BC, Wu Q, He X, Rozen R. Postnatal cerebellar defects in mice deficient  
433 in methylenetetrahydrofolate reductase. *Int J Dev Neurosci Off J Int Soc Dev Neurosci*.  
434 2005 Aug;23(5):465–74.
- 435 22. Levav-Rabkin T, Blumkin E, Galron D, Golan HM. Sex-dependent behavioral effects of  
436 Mthfr deficiency and neonatal GABA potentiation in mice. *Behav Brain Res*.  
437 2011;216(2):505–13.
- 438 23. Sadre-Marandi F, Dahdoul T, Reed MC, Nijhout HF. Sex differences in hepatic one-carbon  
439 metabolism. *BMC Syst Biol [Internet]*. 2018 Oct;12(1). Available from:  
440 <https://pubmed.ncbi.nlm.nih.gov/30355281/>
- 441 24. Blumkin E, Levav-Rabkin T, Melamed O, Galron D, Golan HM. Gender-Specific Effect of  
442 Mthfr Genotype and Neonatal Vigabatrin Interaction on Synaptic Proteins in Mouse Cortex.  
443 *Neuropsychopharmacology*. 2011 Jul;36(8):1714–28.

- 444 25. Stanisławska-Sachadyn A, Woodside JV, Brown KS, Young IS, Murray L, McNulty H, et  
445 al. Evidence for sex differences in the determinants of homocysteine concentrations. *Mol*  
446 *Genet Metab*. 2008 Apr;93(4):355–62.
- 447 26. Christensen KE, Wu Q, Wang X, Deng L, Caudill MA, Rozen R. Steatosis in mice is  
448 associated with gender, folate intake, and expression of genes of one-carbon metabolism. *J*  
449 *Nutr*. 2010;140(10):1736–41.
- 450 27. Kim MH, Kim WH, Kim CG, Kim DW. Synthesis and Evaluation of <sup>99m</sup>Tc-Labeled  
451 Folate-Tripeptide Conjugate as a Folate Receptor-Targeted Imaging Agent in a Tumor-  
452 Bearing Mouse Model. *Nucl Med Mol Imaging*. 2015 Sep;49(3):200–7.
- 453 28. Martínez-Vega R, Murillo-Cuesta S, Partearroyo T, Varela-Moreiras G, Varela-Nieto I,  
454 Pajares MA. Long-term dietary folate deficiency accelerates progressive hearing loss on  
455 CBA/Ca mice. *Front Aging Neurosci*. 2016;8(AUG):1–8.
- 456 29. Flurkey K, Curren JM, Harrison DE. Mouse Models in Aging Research. In: Fox J, Barthold  
457 S, Davisson M, Newcomer C, Quimby F, Smith A, editors. *The-Mouse-in-Biomedical-*  
458 *Research, Normative Biology, Husbandry, and Models* [Internet]. 2nd ed. Elsevier.; 2007.  
459 p. 637–72. Available from: [https://mouseion.jax.org/stfb2000\\_2009/1685](https://mouseion.jax.org/stfb2000_2009/1685)
- 460 30. Molloy AM, Scott JM. Microbiological assay for serum, plasma, and red cell folate using  
461 cryopreserved, microtiter plate method. *Methods Enzymol*. 1997;281:43–53.
- 462 31. Schindelin J, Arganda-Carreras I, Frise E, Kaynig V, Longair M, Pietzsch T, et al. Fiji: An  
463 open-source platform for biological-image analysis. *Nat Methods*. 2012 Jul;9(7):676–82.
- 464 32. Rueden CT, Schindelin J, Hiner MC, DeZonia BE, Walter AE, Arena ET, et al. ImageJ2:  
465 ImageJ for the next generation of scientific image data. *BMC Bioinformatics*. 2017  
466 Dec;18(1):529–529.
- 467 33. Prieur EAK, Pjetri E, Zeisel SH, Jadavji NM. Reduced brain volume and impaired memory  
468 in betaine homocysteine S-methyltransferase knockout mice. *Appl Physiol Nutr Metab*.  
469 2017;42(11).
- 470 34. Niculescu MD, Zeisel SH. Diet, Methyl Donors and DNA Methylation: Interactions  
471 between Dietary Folate, Methionine and Choline. *J Nutr*. 2002 Aug;132(8):2333S-2335S.
- 472 35. Sabri O, Meyer PM, Gräf S, Hesse S, Wilke S, Becker GA, et al. Cognitive correlates of  
473  $\alpha 4\beta 2$  nicotinic acetylcholine receptors in mild Alzheimer's dementia. *Brain*. 2018  
474 Jun;141(6):1840–54.
- 475 36. Cherubini E, Miles R. The CA3 region of the hippocampus: How is it? What is it for? How  
476 does it do it? *Front Cell Neurosci* [Internet]. 2015 Feb;9(FEB). Available from:  
477 <https://pubmed.ncbi.nlm.nih.gov/25698930/>

- 478 37. Kasture VV, Sundrani DP, Joshi SR. Maternal one carbon metabolism through increased  
479 oxidative stress and disturbed angiogenesis can influence placental apoptosis in  
480 preeclampsia. *Life Sci.* 2018;206(May):61–9.
- 481 38. Kruman II, Culmsee C, Chan SL, Kruman Y, Guo Z, Penix L, et al. Homocysteine elicits a  
482 DNA damage response in neurons that promotes apoptosis and hypersensitivity to  
483 excitotoxicity. *J Neurosci Off J Soc Neurosci.* 2000 Sep 15;20(18):6920–6.
- 484 39. Kruman II, Kumaravel TS, Lohani A, Pedersen WA, Cutler RG, Kruman Y, et al. Folic  
485 acid deficiency and homocysteine impair DNA repair in hippocampal neurons and sensitize  
486 them to amyloid toxicity in experimental models of Alzheimer’s disease. *J Neurosci Off J*  
487 *Soc Neurosci.* 2002 Mar 1;22(5):1752–62.
- 488 40. Hoffman M. Hypothesis: Hyperhomocysteinemia is an indicator of oxidant stress. *Med*  
489 *Hypotheses.* 2011 Dec;77(6):1088–93.
- 490 41. Lipton SA, Kim W-K, Choi Y-B, Kumar S, D’Emilia DM, Rayudu PV, et al. Neurotoxicity  
491 associated with dual actions of homocysteine at the N-methyl-D-aspartate receptor. *Proc*  
492 *Natl Acad Sci.* 1997 May 27;94(11):5923–8.
- 493 42. Zhang JW, Yan R, Tang YS, Guo YZ, Chang Y, Jing L, et al. Hyperhomocysteinemia-  
494 induced autophagy and apoptosis with downregulation of hairy enhancer of split 1/5 in  
495 cortical neurons in mice. *Int J Immunopathol Pharmacol.* 2017;30(4):371–82.
- 496 43. McIlwain DR, Berger T, Mak TW. Caspase functions in cell death and disease. *Cold Spring*  
497 *Harb Perspect Biol.* 2013 Apr;5(4):1–28.
- 498 44. Liu F, Li Z, Li J, Siegel C, Yuan R, McCullough LD. Sex differences in caspase activation  
499 after stroke. *Stroke.* 2009 May;40(5):1842–8.
- 500 45. Siegel C, Li J, Liu F, Benashski SE, McCullough LD. miR-23a regulation of X-linked  
501 inhibitor of apoptosis (XIAP) contributes to sex differences in the response to cerebral  
502 ischemia. *Proc Natl Acad Sci U S A.* 2011 Jul;108(28):11662–7.
- 503 46. Forger NG, Rosen GJ, Waters EM, Jacob D, Simerly RB, De Vries GJ. Deletion of Bax  
504 eliminates sex differences in the mouse forebrain. *Proc Natl Acad Sci U S A.* 2004  
505 Sep;101(37):13666–71.
- 506 47. Yagi S, Chow C, Lieblisch SE, Galea LAM. Sex and strategy use matters for pattern  
507 separation, adult neurogenesis, and immediate early gene expression in the hippocampus.  
508 *Hippocampus.* 2016 Jan;26(1):87–101.
- 509 48. van Eijk L, Hansell NK, Strike LT, Couvy-Duchesne B, de Zubicaray GI, Thompson PM,  
510 et al. Region-specific sex differences in the hippocampus. *NeuroImage.* 2020  
511 Jul;215:116781–116781.
- 512 49. Kolb B, Whishaw IQ, Teskey GC. *An Introduction to Brain and Behavior. Fifth.* New  
513 York: Worth Publishers; 2016.

- 514 50. Jadavji N, Emmerson JT, Shanmugalingam U, Willmore WG, Macfarlane AJ, Smith PD. A  
515 genetic deficiency in folic acid metabolism impairs recovery after ischemic stroke. *Exp*  
516 *Neurol.* 2018;309:14–22.
- 517 51. Jadavji NM, Mosnier H, Kelly E, Lawrence K, Cruickshank S, Stacey S, et al. One-carbon  
518 metabolism supplementation improves outcome after stroke in aged male MTHFR-deficient  
519 mice. *Neurobiol Dis.* 2019;132.

520



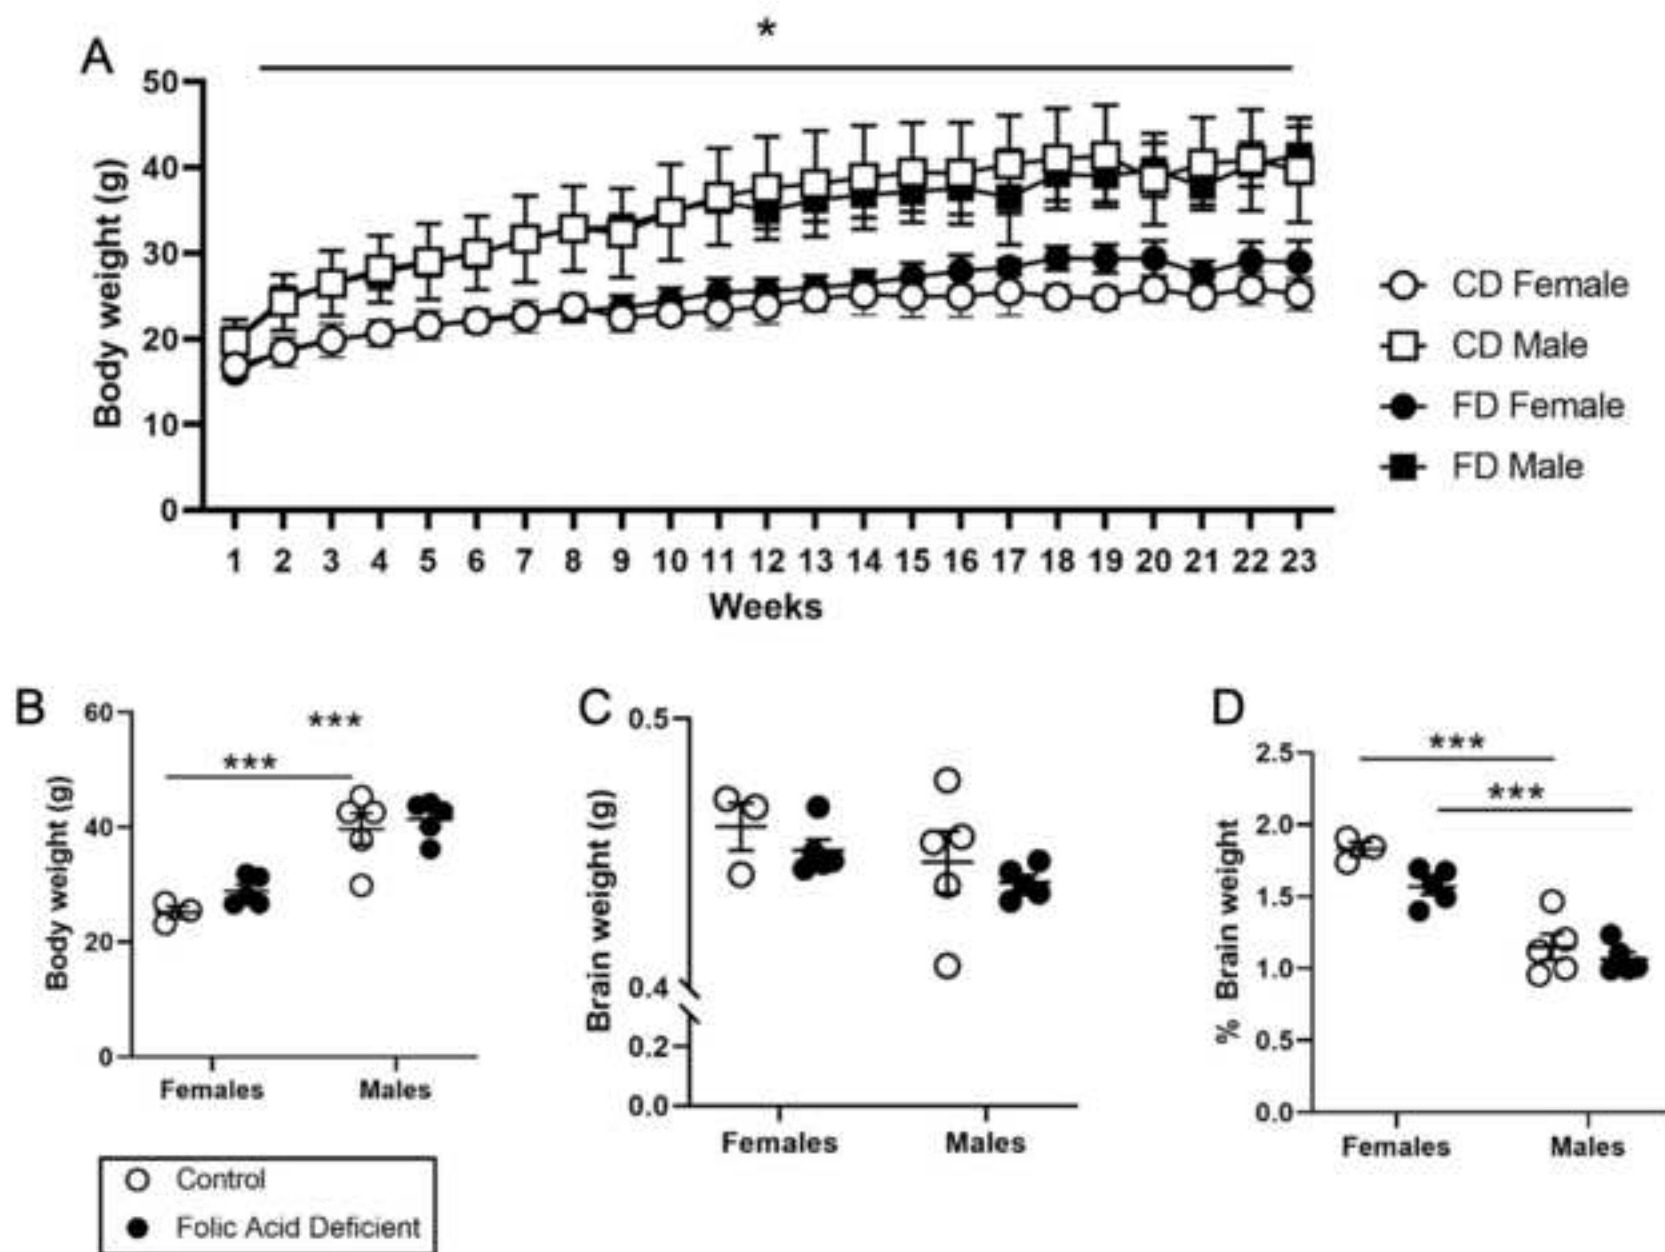



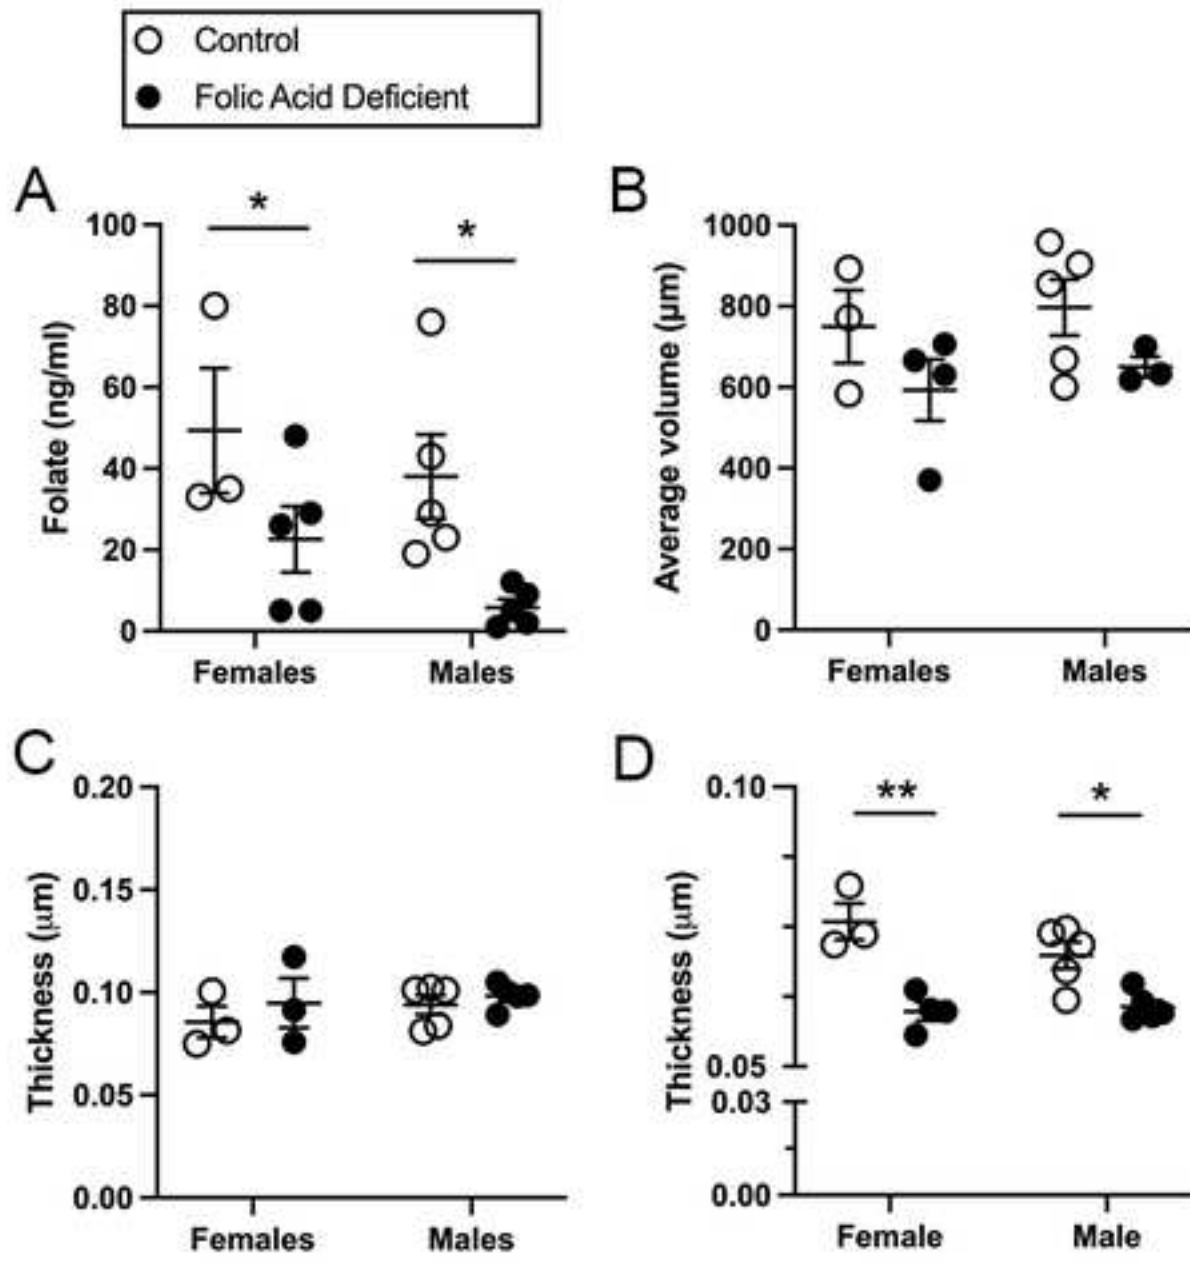

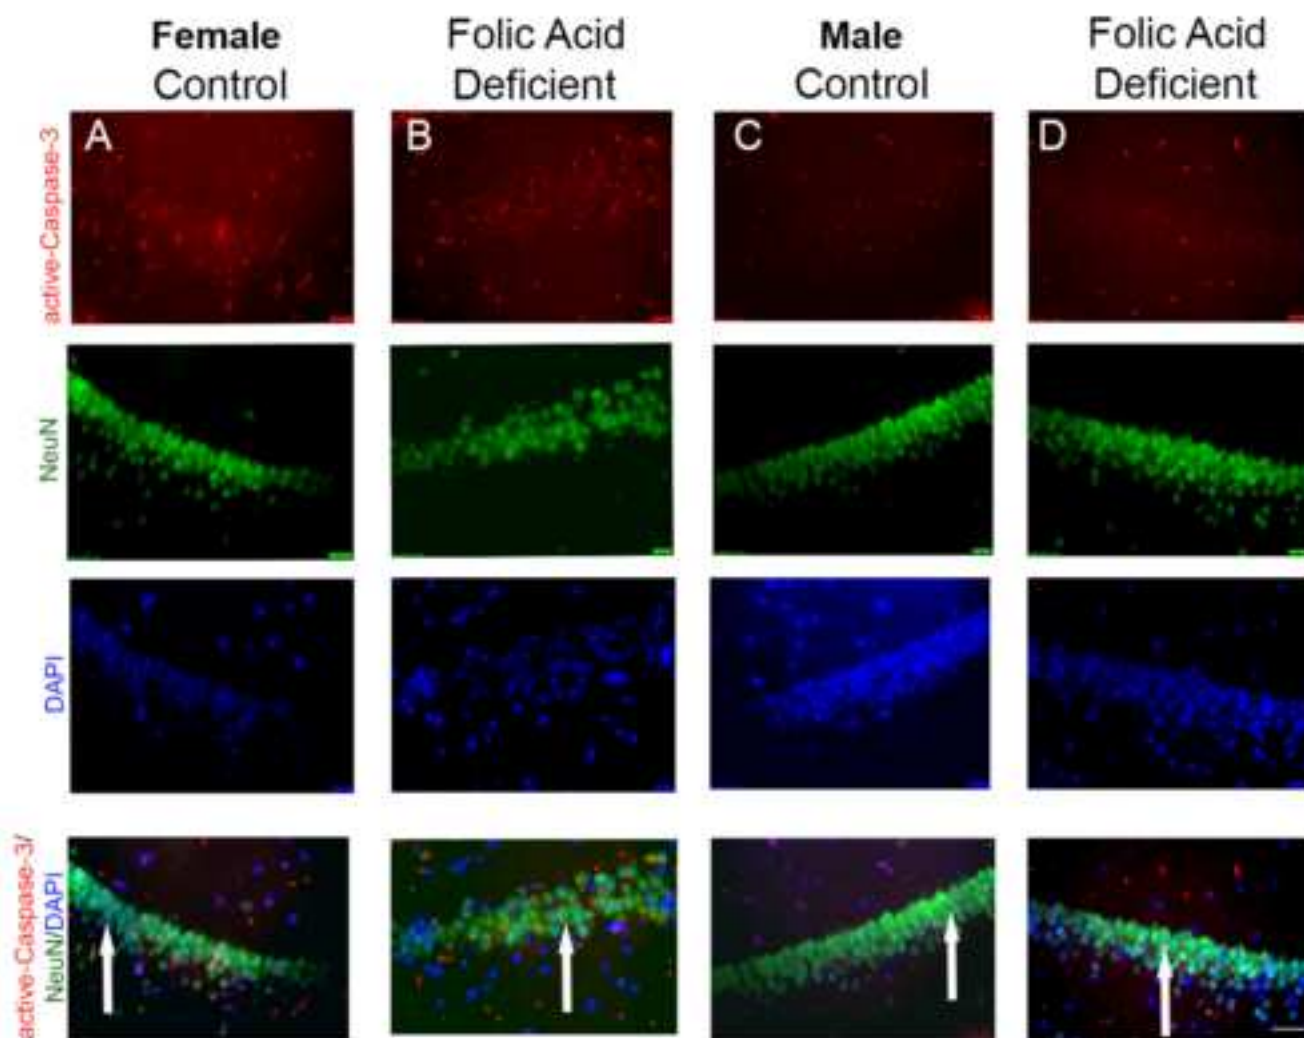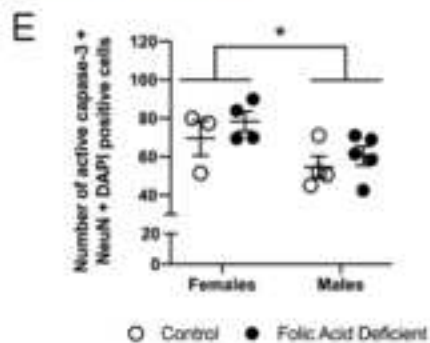

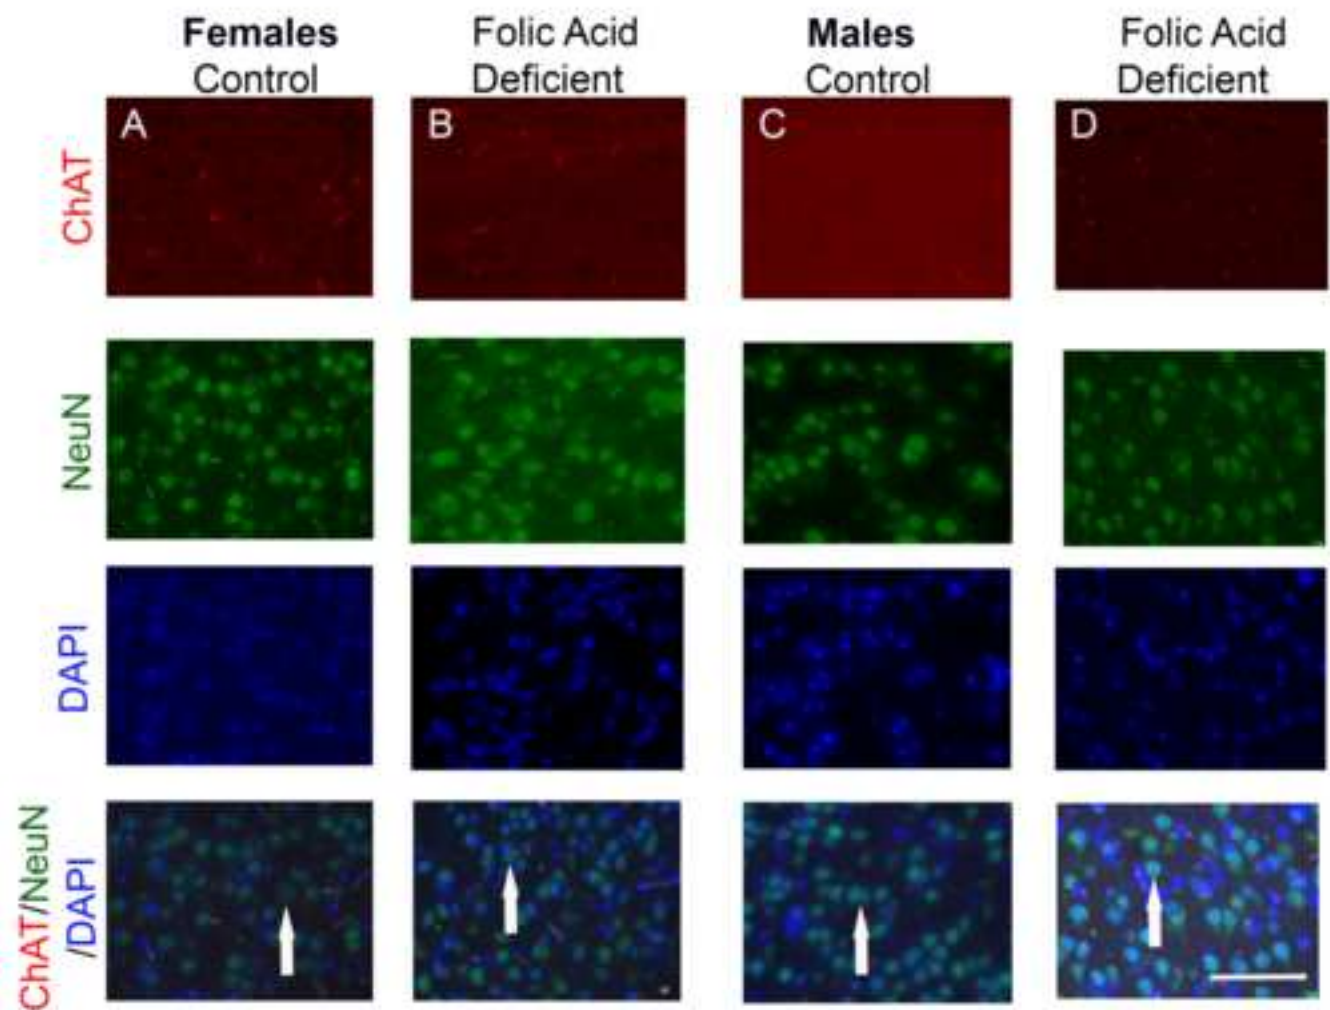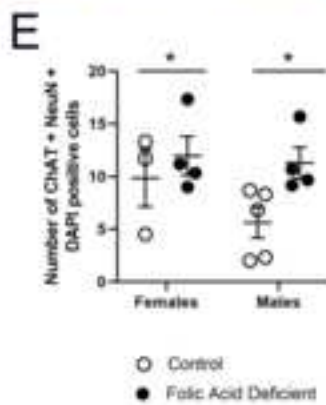

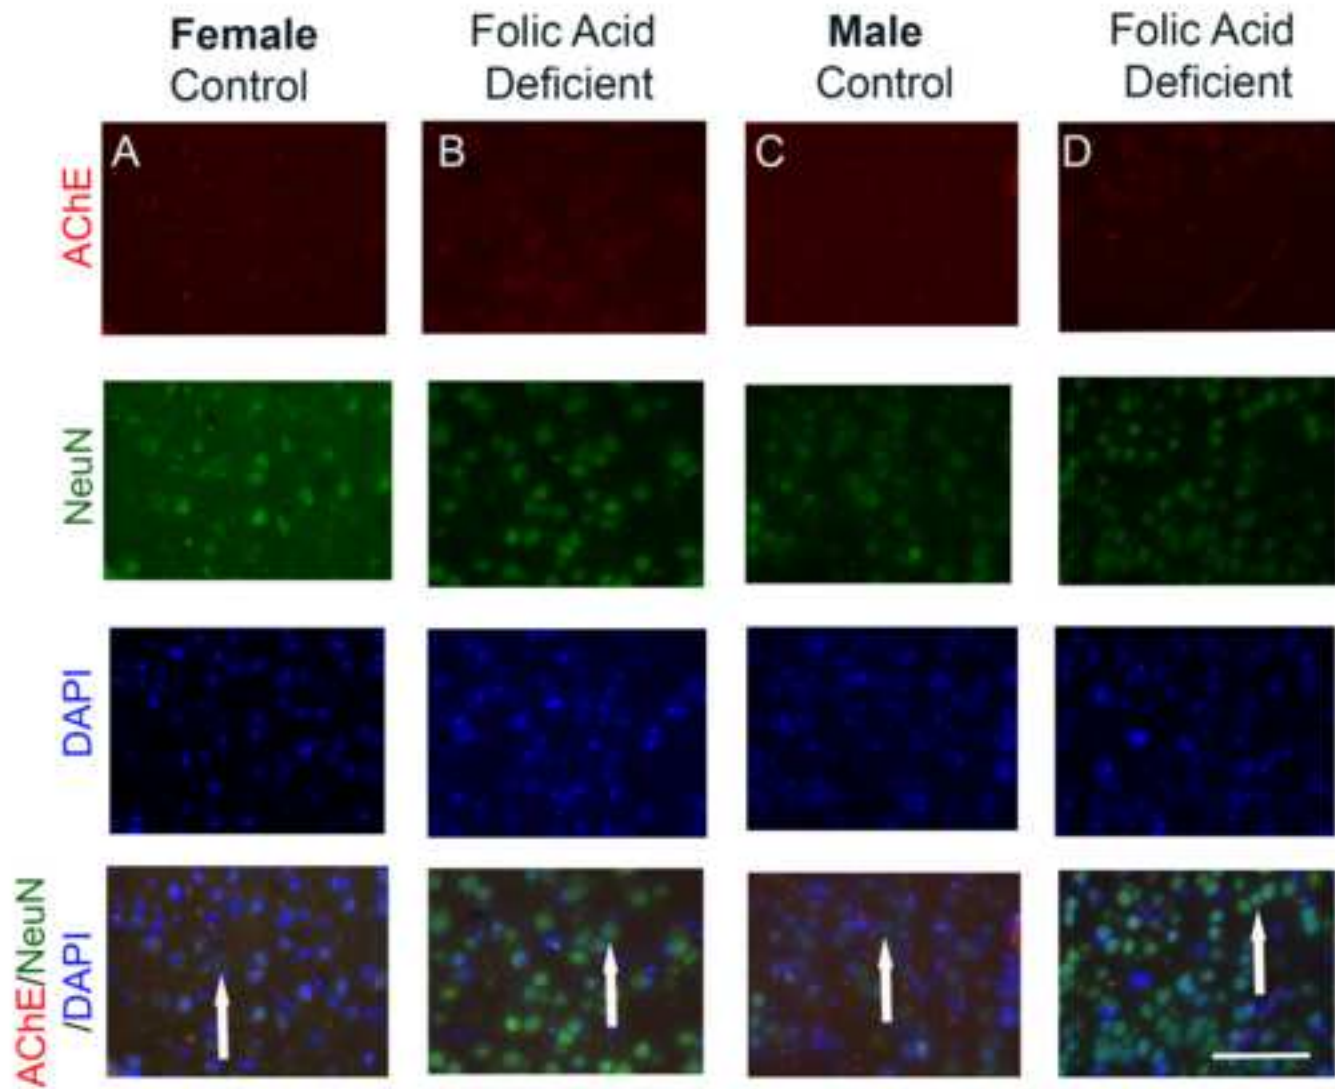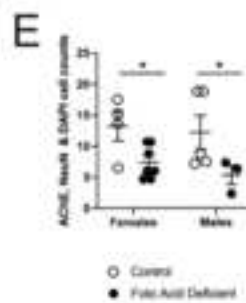

Source: https://www.biorxiv.org/content/10.1101/2020.12.13.422535.full.pdf
